# Supplementary material
Source: HighWire-hosted journal article supplement (https://diabetes.diabetesjournals.org/content/suppl/2005/10/26/54.11.3305)
Supplement: db0427OnlineAppendix.pdf [file db0427OnlineAppendix.pdf]

**Supplemental Table 1. Primer sequences and assay methods. Sequence information is provided for all SNPs that were not genotyped as AB TaqMan Pre-Designed SNP Genotyping Assays.**

| Gene         | Assay ID    | SNP ID     | Assay Type | Forward Primer                  | Reverse Primer                 |                  |
|--------------|-------------|------------|------------|---------------------------------|--------------------------------|------------------|
| AGT          | hCV1985481  | rs699      | AB Custom  | AGTGGACGTAGGTGTTGAAAGC          | GCTGTGACAGGATGGAAGACT          |                  |
| CCL5         | hCV15874396 | rs2280788  | AB Custom  | CTCAGGCTGGCCCTTTATAGG           | TGCTATTTTGAAACTCCCCTTAGG       |                  |
| CCR5         | rs1799987   | rs1799987  | AB Custom  | GGGTGGTGAGCATCTGTGT             | GCCAACTTAAACCAACTTTAAATGTAGAGG |                  |
| COL4A2       | rs4773154   | rs4773154  | AB Custom  | TGCTCATGCGTGTACACACA            | CCCCAGAGGCAGGTATAGTCTTTT       |                  |
| CYBA         | hCV7516913  | rs1049255  | AB Custom  | GCTCCCGGCTTCGCT                 | CCGACGAGGTCGTGTGA              |                  |
| GFPT2        | hCV15758474 | rs2303007  | AB Custom  | TGGCTCCTCCTACCTTGGT             | GCGGCGTCCACATCAAC              |                  |
| IL1B         | hCV9546517  | rs1143634  | AB Custom  | CCTAAACAACATGTGCTCCACATT        | ATCGTGCACATAAGCCTCGTTA         |                  |
| LAMC1        | hCV3127512  | rs7410919  | AB Custom  | TTCCTGCCTTAGCCTGCAATT           | GCTGCTCTGTGCTTCATG             |                  |
| LAMC1        | hCV3127518  | rs20557    | AB Custom  | GCCAGTGCAGTGACAACATC            | CCCGTCAAGCGATTGCAATTTT         |                  |
| LAMC1        | hCV3127531  | rs2296288  | AB Custom  | GGCCCTGGATTCTTACCA              | GCGGTTTGCCTTGGAGTAG            |                  |
| LAMC1        | hCV3127469  | rs3818419  | AB Custom  | GCCAAGAACAAGGCCATGA             | AGGAAACGCACACCTTTTGA           |                  |
| LAMC1        | hCV11632431 | rs7556132  | AB Custom  | TGAATAGGCCATGCTCTTGTGATC        | CGACATTGTCTTGGCAAACACATCT      |                  |
| LPL          | hCV12104266 | rs285      | AB Custom  | GGTTTTGCTTAATTCTCAATTCAATGTCTCT | CAAAAACAGAAGAACAACAACAAAACCC   |                  |
| LPL          | h1843003    | rs320      | AB Custom  | CACCATGTGTACCCATAAAATGAATT      | AGCACACTATAGTTTGCAAAATCCCA     |                  |
| PRKCB1       | hCV27475914 | rs3760106  | AB Custom  | CCCCCTTCATCCACCACTAC            | GGCCTGACTACAAAGCATCCT          |                  |
| SLC12A3      | hCV9609063  | rs11643718 | AB Custom  | CATCCTCCCTGACATCAACCA           | GAAGCCCCAAAACAGAACTTACTG       |                  |
| TGFB1        | hCV22272997 | rs1982073  | AB Custom  | AGGCGTCAGCACCAGTAG              | CGCGCTCTCGGCAGT                |                  |
| USF1         | rs2073658   | rs2073658  | AB Custom  | GGTGGCCAGAGTAAGAAGACAAAAT       | CCTCGGCCTCCCAAAGTG             |                  |
| Gene         | Assay ID    | SNP ID     | Assay Type | Forward Primer                  | Reverse Primer                 |                  |
| TAZ          | rs1344816fp | rs1344816  | FP         | GGTTAGGCTAGCTTCTCCTC            | TTCTCTGAAGCCTAAGTTG            |                  |
| AGTR1        | rs1492103fp | rs1492103  | FP         | GGAGAGGAGCTGTAGAAAATC           | TGTGTGTGTATCATCCATCC           |                  |
| AGTR1        | rs5182fp    | rs5182     | FP         | TCGATACCTGGCTATTGTTC            | CTTCTTTAGGGCCTTCCAA            |                  |
| AGTR1        | rs5186fp    | rs5186     | FP         | ATGTAAGCTCATCCACCAAG            | CAGCCGTCATCTGTCTAATG           |                  |
| AGTR1 region | rs427832fp  | rs427832   | FP         | GAAAGCAGCTGGTGTACTC             | TTCTCCTACCATCCACTTA            |                  |
| Gene         | Assay ID    | SNP ID     | Assay Type | Forward Primer                  | Reverse Primer                 | Restriction Site |
| ADRB3        | rs4994      | rs4994     | RFLP       | CCAATACCGCCAACACCAG             | AGGAGTCCCATCACCAGGTC           | Mva I            |
| AKR1B1       | rs759853    | rs759853   | RFLP       | AGGACCAGGCGGAAGAAG              | ACCCAACCCAGGATGG               | Mae I            |
| ENPP1/PC-1   | rs1044498   | rs1044498  | RFLP       | GCAATTCTGTGTTCACTTTGGA          | CCTATGTAAAGCCCCGCTAA           | Ava II           |
| GLUT1/SLC2A1 | rs841853    | rs841853   | RFLP       | TGTGCAACCCATGAGCTAA             | CCTGGTCTCATCTGGATTCT           | Xba I            |
| IL1A         | rs1800587   | rs1800587  | RFLP       | AAGCTTGTTTACCACCTGAACTAGGC      | TTACATATGAGCCTTCCATG           | Nco I            |
| IL1R1        | rs2234650   | rs2234650  | RFLP       | TTGGAGGATGGCCATGAAGACC          | CTGTTACGCGCCCGGATGAAAAA        | Pst I            |
| IL1RN        | IL1RN-VNTR  |            | VNTR       | CTCAGCAACACTCCTAT               | TCCTGGTCTGCAGGTAA              |                  |
| MTHFR        | rs1801133   | rs1801133  | RFLP       | GCCAGCCTCTCTGACTGT              | TGGGAAGAACTCAGCGAACT           | Hinf I           |
| NPPA         | rs5065      | rs5065     | RFLP       | GGCACACTCATACATGAAGCTGACTTTT    | GCAGTCTGTCCCTAGGCCCA           | Sca I            |

| GENE         | Assay ID     | Assay Type | Forward Primer                          | Reverse Primer                      | Product size (bp) |
|--------------|--------------|------------|-----------------------------------------|-------------------------------------|-------------------|
| AGT          | D1S103       | STRP       | <b>TET</b> -TAGATCTCTCAGCTATTACAAGG     | GTTTCAGAGAAACTGACCTGTGG             | 112-130           |
| AGTR1        | ATCA         | STRP       | <b>FAM</b> -GTATTCCATGTGAAACAGCT        | AGGAGAAATGTTCCAAGGGAC               | 130-150           |
| AGTR1 region | D3S1308      | STRP       | <b>FAM</b> -CCT AGT CAG TCC AAG GAA CTT | TGA TTT TAG GCA GCA GTG AA          | 102-114           |
| AQP1         | D7S526       | STRP       | <b>HEX</b> -AACAAGGGCTTCTGCTGAG         | CCATCTTGGTGTGAGGGC                  | 111-140           |
| ARK1B1       | AKR1B1-STRP  | STRP       | <b>(P33)</b> -GAATCTTAACATGCTCTGAACC    | GCCCAGCCCTATACCTAGTGT               | 132-148           |
| COL4A1       | afm073we5    | STRP       | <b>TET</b> -GACTCCTGGCATCTAAAGTT        | CCCATGTAATCCTGTCTTCCTTGT            | 171-190           |
| COL4A3       | COL4A3-STRP1 | STRP       | AGGCAGCAAGAAAGGTGAAC                    | <b>TET</b> -CTCTTCTTTGTTTTTGTCTCCTC | 118-154           |
| D7S500       | D7S500       | STRP       | <b>HEX</b> -CCA GAA TTG AAA ACT CAG CA  | ATT GAT TGA GGA ACT GAA CTT ACC T   | 185-212           |
| ECE-1        | D1S478       | STRP       | <b>HEX</b> -AATGCCCAATACCCAGTACC        | TCTGCTGAGTATGGAGTGCGTGT             | 109-135           |
| EDN2v2       | EDN2-STRP1   | STRP       | <b>TET</b> -CTGCGTGCTGAGTCTACCTG        | ATAGCTAAGCTGCCCCATC                 | 256-261           |
| EDNRA        | EDNRA-STRP1  | STRP       | <b>FAM</b> -TAGTCACCGAATTGCTGCTG        | TTCTTCTGCCTTGCAATTTT                | 228-242           |
| EDNRB        | D13S1281     | STRP       | <b>FAM</b> -CAAATCTGAACCTCTTACCTC       | GTCTAGAGTGAGTAAGTTGG                | 206-224           |
| EGF          | D4S2623      | STRP       | <b>HEX</b> -GGCACACCTGCAACTAAATTC       | GCCAGATACATGGCTAAGGA                | 221-258           |
| GLUT2        | GLUT2-STRP1  | STRP       | <b>FAM</b> -TCC GTC AGC AGC TAT TCT AG  | CAA ATA GTC CTC ATG CAG AA          | 168-222           |
| HSPG1        | D8S1018      | STRP       | <b>HEX</b> -GCACTCTCAATTCTGTTCT         | CTGCGGCTCTTTGTACCC                  | 311-325           |
| HSPG2        | HSPG2-STRP1  | STRP       | <b>TET</b> -GCCTCCTAGAGGTATAAGCTAAA     | GGAATTCCTCATGTAGGGTGA               | 160-176           |
| IGF1         | MFD1         | STRP       | <b>FAM</b> -AAC CCT CAA GAG GGT ATT GC  | ACC ACT CTG GGA GAA GGG TA          | 193-218           |
| IGF1R        | AFMA305YE1   | STRP       | <b>HEX</b> -GGATATATATGCTGTCTACC        | TTATTAAGTGTCTTCAAGTGGG              | 157-172           |
| IL1A         | MFD68A       | STRP       | CACCATAGGTGGGGACCTAACT                  | <b>HEX</b> -TCACTGGTGAAGAGAAGAACC   | 143-162           |
| ITGA3        | ITGA3-STRP1  | STRP       | ACCTTCATCGAGGTCAGTG                     | <b>FAM</b> -GAGGTGGGACAGTAATGGAC    | 233-252           |
| LAMA4        | LAMA4-STRP1  | STRP       | <b>TET</b> -TTGGATGCTCACGGTCTAGTG       | GTGGAGTCACTCTTGATTGCTG              | 103-136           |
| LAMB1        | D7S3074      | STRP       | GTTACATGGTCCCACCTTGG                    | <b>FAM</b> -TCACACCTGGGGTAAAGTTTG   | 122-147           |
| LAMC1        | LAMC1-STRP1  | STRP       | <b>TET</b> -GTGCTTTATTTCTGTGCAG         | GAAGTGTATGGGTTATGGG                 | 213-233           |
| MMP9         | D20S838      | STRP       | <b>FAM</b> -TCTCATGCTGGTGTCTGC          | GAGGCGCTCCTGTGAC                    | 103-127           |
| NPHS1        | D19S610      | STRP       | <b>HEX</b> -CTCCAAGGACTCGGGAATTT        | TGAAATCAGACCGTGAACA                 | 149-175           |
| PDGFB        | PDGFB-STRP1  | STRP       | <b>HEX</b> -GAGCTCAGAGGTGAATTTGC        | GTTGGTCATCACAGTGATGG                | 104-121           |
| PRKCB        | D16S420      | STRP       | <b>FAM</b> -ATTTCTGAGGTCTAAAGCACCC      | TTAGGCCAGTCCAFACTCAAG               | 178-200           |
| SLC9A1       | SLC9A1-STRP1 | STRP       | GGATGGGAGAAGTGTTTTTTC                   | <b>FAM</b> -CCTCCATCAATTGGAAGTTTG   | 130-152           |
| TGFBR3       | D1S1588      | STRP       | <b>FAM</b> -CTGGTCCCATAGCTAGTAAACG      | ATGAGGTCCCATTACCAT                  | 117-142           |
| TIMP-3       | D22S280      | STRP       | <b>HEX</b> -GCTCCAGCCTATCAGGATG         | GATTCCAGATCACAAAAGTGGT              | 206-222           |
| VEGF         | VEGF-STRP1   | STRP       | <b>TET</b> -GGCAGGATACAAACCTGGTG        | ATTGGCACTGGACCAAAGAG                | 188-194           |

**Supplemental Table 2. Results from TDT analysis for SNPs and STRPs tested in 115 candidate genes.**

| DN CANDIDATE GENE                                      | Gene<br>Symbol | AssayID     | dbSNP      | Location                 | Alleles |        | not total |    |      |      | $\chi^2$       | p                                                                                      | marker location<br>(UCSC hg17)             | gene size<br>(kb) |  |
|--------------------------------------------------------|----------------|-------------|------------|--------------------------|---------|--------|-----------|----|------|------|----------------|----------------------------------------------------------------------------------------|--------------------------------------------|-------------------|--|
|                                                        |                |             |            |                          | T*      | T      | T         | %T |      |      |                |                                                                                        |                                            |                   |  |
| angiotensin I converting enzyme                        | ACE            | hCV1247701  | rs4293     | intron                   | A/G     | A      | 39        | 33 | 72   | 0.54 | 0.5            | chr17:58909398<br>chr17:58917190<br>chr17:58919489-58919765<br>chr17:58937488          | 20.5                                       |                   |  |
|                                                        |                | hCV1247713  | rs4329     | intron                   | A/G     | A      | 37        | 32 | 69   | 0.54 | 0.4            |                                                                                        |                                            |                   |  |
|                                                        |                | ACEin/del   |            | intron16-287bp<br>in/del | del     |        | 38        | 31 | 69   | 0.55 | 0.7            |                                                                                        |                                            |                   |  |
|                                                        |                | hCV1247681  | rs4267385  | intron                   | C/T     | C      | 31        | 30 | 61   | 0.51 | 0              |                                                                                        |                                            |                   |  |
| activin A receptor, type II                            | ACVR2          | hCV11175435 | rs1895694  | intron                   | T/C     | C      | 33        | 27 | 60   | 0.55 | 0.6            | chr2:148453478<br>chr2:148476850<br>chr2:148497300<br>chr2:148504833<br>chr2:148514159 | 82.9                                       |                   |  |
|                                                        |                | hCV7608216  | rs1424941  | intron                   | C/T     | C      | 23        | 20 | 43   | 0.53 | 0.2            |                                                                                        |                                            |                   |  |
|                                                        |                | hCV3144660  | rs12987286 | intron                   | G/T     | T      | 31        | 28 | 59   | 0.53 | 0.2            |                                                                                        |                                            |                   |  |
|                                                        |                | hCV11175391 | rs3768688  | intron                   | G/A     | A      | 33        | 27 | 60   | 0.55 | 0.6            |                                                                                        |                                            |                   |  |
|                                                        |                | hCV3144652  | rs2303392  | intron                   | C/G     | C      | 30        | 25 | 55   | 0.55 | 0.5            |                                                                                        |                                            |                   |  |
| angiotensinogen                                        | AGT            | D1S103      |            | 1.3 kb 3'                |         |        | 120 bp    | 27 | 23   | 50   | 0.54           | 0.3                                                                                    | chr1:227143598-227143723<br>chr1:227152529 | 11.6              |  |
|                                                        |                | hCV1985481  | rs699      | Met(T)235Thr(C)          | T/C     | T      | 36        | 33 | 69   | 0.52 | 0.1            |                                                                                        |                                            |                   |  |
| AGTR1 (angiotensin II receptor, type 1)-D3S1308 region | AGTR1          | rs1492103   | rs1492103  | intron                   | C/T     | C      | 30        | 30 | 60   | 0.5  | 0              | chr3:149915662<br>chr3:149942093<br>chr3:149942686                                     | 45.1                                       |                   |  |
|                                                        |                | rs5182      | rs5182     | Leu191Leu                | C/T     | C      | 32        | 26 | 58   | 0.55 | 0.6            |                                                                                        |                                            |                   |  |
|                                                        |                | rs5186      | rs5186     | A1166C in 3' UTR         | A/C     | C      | 29        | 19 | 48   | 0.6  | 2.1            |                                                                                        |                                            |                   |  |
|                                                        | intergenic     | rs427832    | rs427832   | intergenic               | C/T     | C      | 23        | 20 | 43   | 0.53 | 0.2            | chr3:149949061<br>chr3:149952723-149952854                                             | 31.8                                       |                   |  |
|                                                        | intergenic     | ATCA        |            | 9.3kb 5' of<br>AGTR1     |         | 139 bp | 38        | 34 | 72   | 0.53 | 0.2            |                                                                                        |                                            |                   |  |
|                                                        | CPA3           | hCV9146233  | rs1845413  | intron                   | G/A     | A      | 28        | 23 | 51   | 0.55 | 0.5            | chr3:150074106<br>chr3:150268806                                                       | 56.4                                       |                   |  |
|                                                        | SMARCA3        | hCV8759101  | rs812249   | Thr(A)303Thr(G)          | C/T     | C      | 23        | 21 | 44   | 0.52 | 0.1            |                                                                                        |                                            |                   |  |
|                                                        | HPS3           | hCV1732626  | rs6440589  | Gln(A)498Gln(G)          | G/A     | A      | 31        | 19 | 50   | 0.62 | 2.9            | chr3:150355685<br>chr3:150516912-150517019                                             | 43.9                                       |                   |  |
|                                                        | intergenic     | D3S1308     |            | 573 kb 5' of<br>AGTR1    |         | 106 bp | 17        | 42 | 59   | 0.29 | 10.6           |                                                                                        |                                            | 0.001             |  |
|                                                        |                |             |            |                          |         |        | 108 bp    | 47 | 25   | 72   | 0.65           | 6.7                                                                                    | 0.010                                      |                   |  |
|                                                        |                | hCV2041187  | rs2293418  | intergenic               | A/G     | A      | 43        | 28 | 71   | 0.61 | 3.2            | chr3:150519833                                                                         |                                            |                   |  |
|                                                        | LOC116441      | hCV8759413  | rs1526786  | intron                   | T/C     | T      | 28        | 21 | 49   | 0.57 | 1              | chr3:150533623                                                                         | 12.6                                       |                   |  |
|                                                        | intergenic     | hCV3201872  | rs10935749 | intergenic               | G/A     | A      | 22        | 20 | 42   | 0.52 | 0.1            | chr3:150,582,273                                                                       |                                            |                   |  |
|                                                        | TM4SF4         | hCV265602   | rs11920457 | intron                   | G/A     | A      | 35        | 25 | 60   | 0.58 | 1.7            | chr3:150682567                                                                         |                                            |                   |  |
|                                                        | TAZ            | hCV2726141  | rs9858354  | intron                   | T/G     | G      | 27        | 19 | 46   | 0.59 | 1.4            | chr3:150732427                                                                         | 137.8                                      |                   |  |
| rs1344816                                              |                |             | rs1344816  | intron                   | T/G     | G      | 31        | 21 | 52   | 0.6  | 1.9            | chr3:150785000                                                                         |                                            |                   |  |
|                                                        | hCV9148272     | rs6807742   | intron     | A/T                      | A       | 24     | 24        | 48 | 0.5  | 0    | chr3:150858118 |                                                                                        |                                            |                   |  |
| intergenic                                             | hCV1794446     | rs1002896   | intergenic | A/G                      | G       | 27     | 23        | 50 | 0.54 | 0.3  | chr3:150932644 |                                                                                        |                                            |                   |  |
| aldose reductase                                       | AKR1B1         | rs759853    | rs759853   | C-106T in 5'UTR          | C/T     | C      | 24        | 24 | 48   | 0.5  | 0              | chr7:133601213<br>chr7:133603077-133603216                                             | 16.8                                       |                   |  |
|                                                        |                | AKR1B1-STRP |            | 1.9 kb 5'                |         | Z-2    | 27        | 22 | 49   | 0.55 | 0.5            |                                                                                        |                                            |                   |  |
|                                                        |                |             |            |                          |         | Z      | 27        | 28 | 55   | 0.49 | 0              |                                                                                        |                                            |                   |  |
|                                                        |                |             |            |                          | Z+2     | 8      | 15        | 23 | 0.35 | 2.1  |                |                                                                                        |                                            |                   |  |
| angiotensin, ribonuclease, RNase                       | ANG            | hCV2742351  | N/A        | intron                   | C/T     | C      | 30        | 24 | 54   | 0.56 | 0.7            | chr14:20229106                                                                         | 9.6                                        |                   |  |

## A family, 5

|                                                  |           |             |            |                  |     |    |        |      |     |      |                |       |                  |       |                        |
|--------------------------------------------------|-----------|-------------|------------|------------------|-----|----|--------|------|-----|------|----------------|-------|------------------|-------|------------------------|
| apolipoprotein C2                                | APOC2     | hCV7837381  | rs5120     | intron           | T/A | T  | 32     | 26   | 58  | 0.55 | 0.6            |       | chr19:50143460   | 3.6   |                        |
|                                                  |           | hCV7837357  | rs892101   | intergenic       | G/A | G  | 29     | 26   | 55  | 0.53 | 0.2            |       | chr19:50147298   |       |                        |
| apolipoprotein C4                                | APOC4     | hCV1841831  | rs1132899  | Leu(T)36Pro(C)   | T/C | T  | 29     | 27   | 56  | 0.52 | 0.1            |       | chr19:50139876   | 3.3   |                        |
| apolipoprotein E                                 | APOE      | APOE-RFLP   | rs429358   | Arg(C)112Cys(T)  |     | ε2 | 12     | 2    | 14  | 0.86 | 7.1            | 0.008 | chr19:50103781   | 3.6   |                        |
|                                                  |           |             | rs7412     | Arg(C)158Cys(T)  |     | ε3 | 20     | 30   | 50  | 0.4  | 2              |       | chr19:50103919   |       |                        |
|                                                  |           |             |            |                  |     | ε4 | 19     | 19   | 38  | 0.5  | 0              |       |                  |       |                        |
| aquaporin 1                                      | AQP1      | hCV2973378  | rs763422   | 5.1 kb 5'        | T/C | T  | 33     | 31   | 64  | 0.52 | 0.1            |       | chr7:30719606    | 13.7  |                        |
|                                                  |           | D7S526      |            | 2.6 kb 5'        |     |    | 125 bp | 38   | 21  | 59   | 0.64           | 4.9   | 0.027            |       | chr7:30721972-30722103 |
|                                                  |           | hCV2973385  | rs1049305  | 3'UTR            | G/C | G  | 27     | 24   | 51  | 0.53 | 0.2            |       | chr7:30737062    |       |                        |
| AXL receptor tyrosine kinase                     | AXL       | hCV11707901 | rs11882467 | intron           | G/T | G  | 29     | 27   | 56  | 0.52 | 0.1            |       | chr19:46446057   | 42.8  |                        |
|                                                  |           | hCV25472343 | rs2304234  | intron           | C/T | T  | 34     | 33   | 67  | 0.51 | 0              |       | chr19:46440593   |       |                        |
|                                                  |           | hCV2731868  | rs8101017  | 0.9 kb 5'        | G/T | T  | 33     | 22   | 55  | 0.6  | 2.2            |       | chr19:46415727   |       |                        |
| B-cell leukemia/lymphoma 2 (bcl-2)proto-oncogene | BCL2      | hCV7905447  | rs1564483  | 3'UTR            | C/T | C  | 31     | 29   | 60  | 0.52 | 0.1            |       | chr18:58945634   | 195.3 |                        |
|                                                  |           | hCV7905342  | rs3943258  | intron           | T/C | T  | 36     | 30   | 66  | 0.55 | 0.5            |       | chr18:58964616   |       |                        |
|                                                  |           | hCV8685764  | rs1481031  | intron           | C/T | C  | 39     | 19   | 58  | 0.67 | 6.9            | 0.009 | chr18:59003065   |       |                        |
|                                                  |           | hCV1408500  | rs12457700 | intron           | C/T | C  | 36     | 16   | 52  | 0.69 | 7.7            | 0.006 | chr18:59011226   |       |                        |
|                                                  |           | hCV1408502  | rs2062011  | intron           | A/T | T  | 42     | 17   | 59  | 0.71 | 10.6           | 0.001 | chr18:59011226   |       |                        |
|                                                  |           | hCV1408482  | rs8083946  | intron           | G/A | G  | 40     | 27   | 67  | 0.6  | 2.5            |       | chr18:59056901   |       |                        |
|                                                  |           | hCV1728132  | rs8084922  | intron           | G/C | G  | 46     | 31   | 77  | 0.6  | 2.9            |       | chr18:59081501   |       |                        |
|                                                  |           | hCV8687299  | rs1381548  | intron           | G/A | G  | 33     | 25   | 58  | 0.57 | 1.1            |       | chr18:59108376   |       |                        |
|                                                  |           | hCV2855833  | rs11152377 | intron           | C/T | C  | 32     | 27   | 59  | 0.54 | 0.4            |       | chr18:59123426   |       |                        |
| hCV2855835                                       | rs2551402 | 4.1 kb 5'   | C/A        | C                | 38  | 30 | 68     | 0.56 | 0.9 |      | chr18:59141002 |       |                  |       |                        |
| bradykinin receptor B2                           | BDKRB2    | hCV11469547 | rs8008168  | intron           | A/G | A  | 29     | 28   | 57  | 0.51 | 0              |       | chr14:95747466   | 39.6  |                        |
|                                                  |           | hCV7565899  | rs1046248  | Cys(T)14Arg(C)   | C/T | C  | 13     | 6    | 19  | 0.68 | 2.6            |       | chr14:95,773,237 |       |                        |
| bone morphogenetic protein 2                     | BMP2      | hCV2513503  | rs235767   | intron           | G/T | G  | 46     | 32   | 78  | 0.59 | 2.5            |       | chr20:6703598    | 10.6  |                        |
| bone morphogenetic protein 7                     | BMP7      | hCV2090176  | rs12479955 | intron           | A/G | A  | 34     | 28   | 62  | 0.55 | 0.6            |       | chr20:55199645   | 95.7  |                        |
|                                                  |           | hCV2090207  | rs230205   | intron           | A/G | A  | 40     | 35   | 75  | 0.53 | 0.3            |       | chr20:55225163   |       |                        |
|                                                  |           | hCV1364067  | rs162316   | intron           | G/A | A  | 25     | 15   | 40  | 0.63 | 2.5            |       | chr20:55242859   |       |                        |
|                                                  |           | hCV1364089  | rs1998190  | intron           | A/C | A  | 42     | 27   | 69  | 0.61 | 3.3            |       | chr20:55256056   |       |                        |
| caldesmon 1                                      | CALD1     | hCV2808728  | rs3807337  | 5' UTR           | A/G | G  | 32     | 28   | 60  | 0.53 | 0.3            |       | chr7:133921077   | 191.3 |                        |
|                                                  |           | hCV348686   | rs1452915  | intron           | A/C | C  | 33     | 26   | 59  | 0.56 | 0.8            |       | chr7:133949547   |       |                        |
|                                                  |           | hCV346465   | rs1377297  | intron           | A/C | C  | 31     | 29   | 60  | 0.52 | 0.1            |       | chr7:134003374   |       |                        |
|                                                  |           | hCV308959   | rs3823571  | intron           | C/T | T  | 36     | 28   | 64  | 0.56 | 1              |       | chr7:134107799   |       |                        |
| catalase                                         | CAT       | hCV1883211  | rs1049982  | 5'UTR            | C/T | C  | 43     | 21   | 64  | 0.67 | 7.6            | 0.006 | chr11:34417117   | 33.1  |                        |
|                                                  |           | hCV3102895  | rs560807   | intron           | A/T | A  | 44     | 27   | 71  | 0.62 | 4.1            | 0.044 | chr11:34425215   |       |                        |
| chemokine (C-C motif) ligand 2                   | CCL2      | hCV11939405 | rs4586     | Cys(C)35Cys(T)   | C/T | T  | 35     | 28   | 63  | 0.56 | 0.8            |       | chr17:29607382   | 1.9   |                        |
| chemokine (C-C motif) receptor 5                 | CCR5      | rs1799987   | rs1799987  | G59029A in 5'UTR | A/T | T  | 33     | 32   | 65  | 0.51 | 0.0            |       | chr3:46386939    | 6.1   |                        |

|                                                                         |        |             |            |                  |     |   |        |    |    |      |      |       |                 |                           |  |
|-------------------------------------------------------------------------|--------|-------------|------------|------------------|-----|---|--------|----|----|------|------|-------|-----------------|---------------------------|--|
|                                                                         |        | hCV2284079  | rs746492   | 3' UTR           | T/G | G | 31     | 30 | 61 | 0.51 | 0    |       | chr3:46392316   |                           |  |
| CD36 antigen                                                            | CD36   | hCV12093946 | rs1984112  | intron           | A/G | G | 35     | 34 | 69 | 0.51 | 0    |       | chr7:79887571   | 38.4                      |  |
|                                                                         |        | hCV8314408  | rs1049654  | exon/5' UTR      | A/C | A | 41     | 28 | 69 | 0.59 | 2.4  |       | chr7:79920106   |                           |  |
|                                                                         |        | hCV1803768  | rs13230419 | 3.0 kb 3'        | C/T | T | 39     | 35 | 74 | 0.53 | 0.2  |       | chr7:79953936   |                           |  |
| Gremlin (gremlin 1 homolog, cysteine knot superfamily (Xenopus laevis)) | GREM1  | hCV180222   | rs3743104  | 3UTR             | G/A | G | 35     | 34 | 69 | 0.51 | 0    |       | chr15:30811277  | 16.6                      |  |
|                                                                         |        |             |            |                  |     |   |        |    |    |      |      |       |                 |                           |  |
| collagen 1A1                                                            | COL1A1 | hCV7477117  | rs909102   | 3UTR             | G/A | A | 25     | 16 | 41 | 0.61 | 2    |       | chr17:45616365  | 17.5                      |  |
|                                                                         |        | hCV1840244  | rs2075558  | intron           | A/C | A | 33     | 26 | 59 | 0.56 | 0.8  |       | chr17:45622584  |                           |  |
| collagen 4A1                                                            | COL4A1 | hCV1964948  | rs1133219  | Ala(T)1490Ala(C) | G/A | A | 29     | 26 | 55 | 0.53 | 0.2  |       | chr13:109611710 | 158.1                     |  |
|                                                                         |        | hCV3147619  | rs2305080  | intron           | T/C | C | 43     | 30 | 73 | 0.59 | 2.3  |       | chr13:109636704 |                           |  |
|                                                                         |        | afm073we5   |            | intron           |     |   | 175 bp | 30 | 36 | 66   | 0.45 | 0.5   |                 | chr13:109648396-109648570 |  |
|                                                                         |        | hCV3147628  | rs532625   | Ala(A)144Ala(T)  | A/T | A | 33     | 25 | 58 | 0.57 | 1.1  |       | chr13:109662226 |                           |  |
|                                                                         |        | hCV3147652  | rs639562   | intron           | T/C | T | 28     | 24 | 52 | 0.54 | 0.3  |       | chr13:109681228 |                           |  |
|                                                                         |        | hCV3147669  | rs614282   | intron           | T/C | C | 40     | 17 | 57 | 0.7  | 9.3  | 0.002 |                 | chr13:109696871           |  |
|                                                                         |        | hCV3147671  | rs679062   | intron           | C/T | T | 43     | 15 | 58 | 0.74 | 13.5 | 0.000 |                 | chr13:109697350           |  |
|                                                                         |        | hCV3147675  | rs9559749  | intron           | G/A | G | 29     | 18 | 47 | 0.62 | 2.6  |       | chr13:109698688 |                           |  |
|                                                                         |        | hCV3147696  | rs627527   | intron           | G/A | A | 44     | 29 | 73 | 0.6  | 3.1  |       | chr13:109713136 |                           |  |
|                                                                         |        | hCV1433329  | rs12431029 | intron           | C/T | C | 34     | 27 | 61 | 0.56 | 0.8  |       | chr13:109751849 |                           |  |
| collagen 4A2                                                            | COL4A2 | hCV1433319  | rs12864206 | intron           | G/A | A | 25     | 24 | 49 | 0.51 | 0    |       | chr13:109763294 | 205.7                     |  |
|                                                                         |        | rs4773154   | rs4773154  | intron           | C/T | T | 41     | 26 | 67 | 0.61 | 3.4  |       | chr13:109767786 |                           |  |
|                                                                         |        | hCV1433253  | rs913746   | intron           | A/C | A | 34     | 34 | 68 | 0.5  | 0    |       | chr13:109814125 |                           |  |
|                                                                         |        | hCV2018517  | rs7338948  | intron           | A/G | G | 40     | 35 | 75 | 0.53 | 0.3  |       | chr13:109883312 |                           |  |
|                                                                         |        | hCV7454753  | rs912947   | intron           | G/C | G | 34     | 26 | 60 | 0.57 | 1.1  |       | chr13:109946660 |                           |  |
| collagen 4A3                                                            | COL4A3 | hCV408687   | rs1950135  | intron           | G/T | T | 39     | 29 | 68 | 0.57 | 1.5  |       | chr2:227888295  | 150.2                     |  |
|                                                                         |        | COL4A3-STRP |            | intron           |     |   | 140 bp | 23 | 24 | 47   | 0.49 | 0     |                 | chr2:227898950-227899087  |  |
|                                                                         |        | hCV497868   | rs11884740 | intron           | A/G | A | 28     | 23 | 51 | 0.55 | 0.5  |       | chr2:227919172  |                           |  |
|                                                                         |        | hCV381070   | rs4603754  | intron           | C/T | C | 35     | 31 | 66 | 0.53 | 0.2  |       | chr2:227955593  |                           |  |
|                                                                         |        | hCV435102   | rs7593299  | intron           | A/C | A | 21     | 20 | 41 | 0.51 | 0    |       | chr2:227979642  |                           |  |
| collagen 4A4                                                            | COL4A4 | hCV11523963 | rs10933164 | 9.3 kb 3'        | A/G | G | 25     | 22 | 47 | 0.53 | 0.2  |       | chr2:227686176  | 159.3                     |  |
|                                                                         |        | hCV16171363 | rs10187726 | Val(G)1513Val(A) | C/T | C | 32     | 28 | 60 | 0.53 | 0.3  |       | chr2:227698500  |                           |  |
|                                                                         |        | hCV435282   | rs2177596  | intron           | A/T | T | 36     | 30 | 66 | 0.55 | 0.5  |       | chr2:227715788  |                           |  |
|                                                                         |        | hCV388099   | rs1320406  | intron           | G/A | A | 32     | 29 | 61 | 0.52 | 0.1  |       | chr2:227745979  |                           |  |
|                                                                         |        | hCV22274313 | rs3736633  | Ser(T)482Pro(G)  | A/G | A | 36     | 30 | 66 | 0.55 | 0.5  |       | chr2:227780104  |                           |  |
|                                                                         |        | hCV72520    | rs1882437  | intron           | T/G | G | 31     | 27 | 58 | 0.53 | 0.3  |       | chr2:227792528  |                           |  |
|                                                                         |        | hCV154148   | rs13003785 | intron           | A/G | G | 30     | 28 | 58 | 0.52 | 0.1  |       | chr2:227821008  |                           |  |
| connective tissue growth factor                                         | CTGF   | hCV1764942  | rs9493150  | 1.5 kb 5'        | G/C | G | 29     | 26 | 55 | 0.53 | 0.2  |       | chr6:132315684  | 3.1                       |  |
| cathepsin D                                                             | CTSD   | hCV189639   | rs1317356  | intron           | C/T | C | 40     | 37 | 77 | 0.52 | 0.1  |       | chr11:1735714   | 11.2                      |  |
| cathepsin L                                                             | CTSL   | hCV2704846  | rs2274611  | intron           | C/T | T | 34     | 31 | 65 | 0.52 | 0.1  |       | chr9:87572229   | 5.3                       |  |

|                                                       |            |             |            |                       |     |        |        |      |     |                |      |                          |                          |      |
|-------------------------------------------------------|------------|-------------|------------|-----------------------|-----|--------|--------|------|-----|----------------|------|--------------------------|--------------------------|------|
| D7S500 (in CCR4-NOT transcription complex, subunit 4) | D7S500     | D7S500      |            | intron of CNOT4 gene  |     | 204 bp | 14     | 26   | 40  | 0.35           | 3.6  | chr7:134565983-134566188 |                          |      |
|                                                       | CNOT4      | hCV16283682 | rs2718168  | intron                | G/C | C      | 34     | 33   | 67  | 0.51           | 0    | chr7:134588604           | 148.3                    |      |
|                                                       |            | hCV2860477  | rs1863005  | intron                | A/G | A      | 35     | 33   | 68  | 0.51           | 0.1  | chr7:134510717           |                          |      |
|                                                       |            | hCV2860407  | rs4732127  | intron                | G/C | C      | 22     | 21   | 43  | 0.51           | 0    | chr7:134648413           |                          |      |
| endothelin converting enzyme 1                        | ECE1       | hCV2221518  | rs212526   | intron                | C/T | C      | 29     | 29   | 58  | 0.5            | 0    | chr1:21330247            | 70.6                     |      |
|                                                       |            | D1S478      |            | intron                |     |        | 128 bp | 21   | 21  | 42             | 0.5  | 0                        | chr1:21345075-21345203   |      |
|                                                       |            | hCV2234019  | rs213045   | 0.3 kb 5'             | G/T | T      | 30     | 26   | 56  | 0.54           | 0.3  | chr1:21362551            |                          |      |
| endothelin 1                                          | EDN1       | hCV3107156  | rs1626492  | intron                | A/G | G      | 23     | 20   | 43  | 0.53           | 0.2  | chr6:12403489            | 6.1                      |      |
| endothelin-2                                          | EDN2       | STRP        |            | intron                |     |        | 257 bp | 22   | 31  | 53             | 0.42 | 1.5                      | chr1:41617809-41618064   | 5.8  |
| endothelin-3                                          | EDN3       | hCV2506285  | rs926632   | intron                | C/T | C      | 34     | 31   | 65  | 0.52           | 0.1  | chr20:57318157           | 25.5                     |      |
|                                                       |            | hCV2506294  | rs260743   | 1.8 kb 5'             | C/T | C      | 31     | 30   | 61  | 0.51           | 0    | chr20:57306280           |                          |      |
| endothelin receptor-type A                            | EDNRA      | hCV8869375  | rs1801708  | 5'UTR                 | A/G | G      | 35     | 33   | 68  | 0.51           | 0.1  | chr4:148759974           | 64                       |      |
|                                                       |            | EDNRA-STRP  |            | intron                |     |        | 238 bp | 25   | 28  | 53             | 0.47 | 0.2                      | chr4:148768764-148769001 |      |
|                                                       |            | hCV1736728  | rs7655670  | intron                | C/T | C      | 29     | 29   | 58  | 0.5            | 0    | chr4:148781443           |                          |      |
|                                                       |            | hCV1736670  | rs5333     | His(C)323His(T)       | C/T | C      | 32     | 28   | 60  | 0.53           | 0.3  | chr4:148818642           |                          |      |
|                                                       |            | hCV1736669  | rs5334     | Glu(A)335Glu(G)       | A/G | A      | 32     | 29   | 61  | 0.52           | 0.1  | chr4:148818678           |                          |      |
| hCV1736665                                            | rs5342     | 3'UTR       | A/G        | A                     | 33  | 30     | 63     | 0.52 | 0.1 | chr4:148822376 |      |                          |                          |      |
| endothelin receptor-type B                            | EDNRB      | D13S1281    |            | 6.7 kb 3'             |     |        | 209 bp | 32   | 24  | 56             | 0.57 | 1.1                      | chr13:77360789-77361002  | 22.4 |
|                                                       |            | hCV11706905 | rs1924919  | 2.6 kb 3'             | A/T | A      | 23     | 21   | 44  | 0.52           | 0.1  | chr13:77364972           |                          |      |
|                                                       |            | hCV1923554  | rs7319342  | intron                | G/A | G      | 33     | 30   | 63  | 0.52           | 0.1  | chr13:77421485           |                          |      |
| epidermal growth factor                               | EGF        | hCV8904301  | rs881878   | intron                | G/A | A      | 23     | 23   | 46  | 0.5            | 0    | chr4:111193652           | 99.4                     |      |
|                                                       |            | hCV335748   | rs10029654 | intron                | A/G | A      | 24     | 23   | 47  | 0.51           | 0    | chr4:111219531           |                          |      |
|                                                       |            | hCV336634   | rs2190907  | intron                | T/C | C      | 31     | 26   | 57  | 0.54           | 0.4  | chr4:111243472           |                          |      |
|                                                       |            | D4S2623     |            | intron                |     |        | 225 bp | 24   | 23  | 47             | 0.51 | 0                        | chr4:111247310-111247616 |      |
|                                                       |            | hCV15955612 | rs2237051  | Met(G)708Ile(A)       | G/A | A      | 31     | 25   | 56  | 0.55           | 0.6  | chr4:111258802           |                          |      |
| ectonucleotide pyrophosphatase/phosphodiesterase 1    | ENPP1/PC-1 | hCV7853208  | rs943003   | intron                | C/T | T      | 32     | 31   | 63  | 0.51           | 0    | chr6:132182705           | 83.2                     |      |
|                                                       |            | rs1044498   | rs1044498  | Lys(A)121Gln(C)-K121Q | A/C | C      | 14     | 13   | 27  | 0.52           | 0    | chr6:132214061           | -                        |      |
| fibulin 1                                             | FBLN1      | hCV2454340  | rs136755   | intron                | G/A | A      | 39     | 35   | 74  | 0.53           | 0.2  | chr22:44256887           | 98.3                     |      |
|                                                       |            | hCV11879747 | rs1119     | intron                | C/G | C      | 41     | 35   | 76  | 0.54           | 0.5  | chr22:44281821           |                          |      |
|                                                       |            | hCV2482867  | rs5764807  | 4.4 kb 3'             | A/T | T      | 34     | 32   | 66  | 0.52           | 0.1  | chr22:44321980           |                          |      |
| fibrillin                                             | FBN1       | hCV2908746  | rs1042078  | 3'UTR                 | A/G | G      | 27     | 20   | 47  | 0.57           | 1    | chr15:46490165           | 234.9                    |      |
|                                                       |            | hCV1865677  | rs755251   | intron                | A/G | G      | 26     | 19   | 45  | 0.58           | 1.1  | chr15:46599312           |                          |      |
|                                                       |            | hCV1865698  | rs683282   | intron                | C/T | C      | 31     | 23   | 54  | 0.57           | 1.2  | chr15:46635025           |                          |      |
|                                                       |            | hCV3093295  | rs1678978  | intron                | C/T | T      | 31     | 26   | 57  | 0.54           | 0.4  | chr15:46663449           |                          |      |
|                                                       |            | hCV3224829  | rs1807301  | intron                | A/G | G      | 27     | 22   | 49  | 0.55           | 0.5  | chr15:46697532           |                          |      |
| fibronectin 1                                         | FN1        | hCV71462    | rs3817500  | Tyr(T)2265Tyr(C)      | A/G | G      | 33     | 26   | 59  | 0.56           | 0.8  | chr2:216055198           | 75.6                     |      |
|                                                       |            | hCV2110676  | rs1250215  | intron                | C/G | C      | 36     | 30   | 66  | 0.55           | 0.5  | chr2:216078545           |                          |      |

|                                                                                                        |                    |             |            |                  |     |    |        |      |    |      |                |       |                 |                          |  |
|--------------------------------------------------------------------------------------------------------|--------------------|-------------|------------|------------------|-----|----|--------|------|----|------|----------------|-------|-----------------|--------------------------|--|
|                                                                                                        |                    | hCV2110728  | rs724617   | intron           | A/G | G  | 37     | 31   | 68 | 0.54 | 0.5            |       | chr2:216107987  |                          |  |
| v-fos FBJ murine osteosarcoma viral oncogene homolog                                                   | FOS                | hCV3269911  | rs1046117  | Se(T)r84Ser(C)   | C/T | C  | 33     | 29   | 62 | 0.53 | 0.3            |       | chr14:74816443  | 3.4                      |  |
| growth arrest-specific 6                                                                               | GAS6               | hCV179552   | rs9577924  | intron           | A/G | A  | 27     | 20   | 47 | 0.57 | 1              |       | chr13:113568626 | 43.5                     |  |
| glutamine-fructose-6-phosphate transaminase 2                                                          | GFPT2              | hCV1391323  | rs7725     | 3'UTR            | C/T | C  | 20     | 20   | 40 | 0.5  | 0              |       | chr5:179660563  | 52.6                     |  |
|                                                                                                        |                    | rs2303007   | rs2303007  | Val(G)471Ile(A)  | C/T | C  | 20     | 19   | 39 | 0.51 | 0              |       | chr5:179673433  |                          |  |
| growth hormone                                                                                         | GH1                | hCV2955804  | rs11079515 | 9.4 kb 5'        | G/C | G  | 33     | 25   | 58 | 0.57 | 1.1            |       | chr17:59359377  | 1.6                      |  |
| glucose transporter-1, solute carrier family 2, member 1                                               | GLUT1/<br>SLC2A1   | hCV16194495 | rs4660238  | Pro(C)196Pro(T)  | C/T | T  | 28     | 21   | 49 | 0.57 | 1              |       | chr1:42808929   | 33                       |  |
|                                                                                                        |                    | hCV1166174  | rs3754219  | intron           | A/C | A  | 31     | 22   | 53 | 0.58 | 1.5            |       | chr1:43068779   |                          |  |
|                                                                                                        |                    | rs841853    | rs841853   | intron           | T/G | T  | 26     | 20   | 46 | 0.57 | 0.8            |       | chr1:43070531   |                          |  |
|                                                                                                        |                    | hCV1166185  | rs1385129  | Ala(C)15Ala(T)   | G/A | A  | 27     | 21   | 48 | 0.56 | 0.8            |       | chr1:43078059   |                          |  |
| glucose transporter-2, solute carrier family 2, member 2                                               | GLUT2/<br>SLC2A2   | hCV3023463  | rs5398     | Phe(C)479Phe(T)  | A/G | A  | 25     | 24   | 49 | 0.51 | 0              |       | chr3:172198532  | 30.6                     |  |
|                                                                                                        |                    | GLUT2-STRP  |            | intron           |     |    | 182 bp | 23   | 22 | 45   | 0.51           | 0     |                 | chr3:172219491-172219700 |  |
| glutathione peroxidase 1                                                                               | GPX1               | hCV7912052  | rs1800668  | 5'UTR            | A/G | G  | 29     | 14   | 43 | 0.67 | 5.2            | 0.022 | chr3:49370761   | 1.2                      |  |
| Gremlin (gremlin 1 homolog, cysteine knot superfamily (Xenopus laevis) transcription factor 2, hepatic | GREM1/<br>CKTSF1B1 | hCV180222   | rs3743104  | 3UTR             | G/A | G  | 35     | 34   | 69 | 0.51 | 0              |       | chr15:30811277  | 16.6                     |  |
|                                                                                                        |                    | hCV2559950  | rs739753   | 2.2 kb 3'        | T/A | T  | 24     | 16   | 40 | 0.6  | 1.6            |       | chr17:33118390  | 58.6                     |  |
|                                                                                                        |                    | hCV11415601 | rs2688     | UTR 3            | C/A | C  | 43     | 25   | 68 | 0.63 | 4.8            | 0.029 | chr17:33121044  |                          |  |
|                                                                                                        |                    | hCV2559930  | rs2269843  | intron           | G/A | A  | 28     | 18   | 46 | 0.61 | 2.2            |       | chr17:33133093  |                          |  |
|                                                                                                        |                    | hCV2559920  | rs2285740  | intron           | C/T | T  | 33     | 32   | 65 | 0.51 | 0              |       | chr17:33142841  |                          |  |
| hCV2559889                                                                                             | rs4430796          | intron      | C/T        | T                | 26  | 25 | 51     | 0.51 | 0  |      | chr17:33172153 |       |                 |                          |  |
| hydroxy-delta-5-steroid dehydrogenase, 3 beta 1 heparan sulfate proteoglycan 1 (syndecan 2)            | HSD3B1             | hCV1843459  | rs3765945  | intron           | G/A | G  | 31     | 30   | 61 | 0.51 | 0              |       | chr1:119763488  | 7.8                      |  |
|                                                                                                        |                    | hCV2087148  | rs2439516  | 1.2 kb 5'        | C/T | T  | 31     | 22   | 53 | 0.58 | 1.5            |       | chr8:97573917   | 118.1                    |  |
|                                                                                                        |                    | D8S1018     |            | intron           |     |    | 315 bp | 25   | 37 | 62   | 0.4            | 2.3   |                 | chr8:97599065-97599385   |  |
|                                                                                                        |                    | hCV2087297  | rs2582846  | intron           | A/T | T  | 24     | 22   | 46 | 0.52 | 0.1            |       | chr8:97642858   |                          |  |
|                                                                                                        |                    | hCV2087211  | rs2651472  | intron           | G/T | G  | 34     | 29   | 63 | 0.54 | 0.4            |       | chr8:97665849   |                          |  |
|                                                                                                        |                    | hCV11331168 | rs1042381  | Thr(A)71Ser(T)   | A/T | A  | 24     | 18   | 42 | 0.57 | 0.9            |       | chr8:97683837   |                          |  |
| heparan sulfate proteoglycan 2 (perlecan)                                                              | HSPG2              | hCV3036142  | rs6695528  | 1.1 kb 3'        | A/G | A  | 34     | 21   | 55 | 0.62 | 3.1            |       | chr1:21893470   | 115                      |  |
|                                                                                                        |                    | hCV15966517 | rs2291827  | His(C)3211Tyr(T) | A/G | A  | 20     | 12   | 32 | 0.63 | 2              |       | chr1:21911293   |                          |  |
|                                                                                                        |                    | hCV1603698  | rs2305562  | intron           | A/G | A  | 37     | 32   | 69 | 0.54 | 0.4            |       | chr1:21929045   |                          |  |
|                                                                                                        |                    | HSPG2-STRP  |            | intron           |     |    | 165 bp | 21   | 20 | 41   | 0.51           | 0     |                 | chr1:21954096-21954263   |  |
|                                                                                                        |                    | hCV1603733  | rs878949   | intron           | C/T | T  | 29     | 28   | 57 | 0.51 | 0              |       | chr1:21972397   |                          |  |
|                                                                                                        |                    | hCV205528   | rs9426783  | intron           | C/T | T  | 23     | 18   | 41 | 0.56 | 0.6            |       | chr1:21994363   |                          |  |
| intercellular adhesion molecule 1                                                                      | ICAM1              | hCV944685   | rs281432   | intron           | C/G | C  | 47     | 34   | 81 | 0.58 | 2.1            |       | chr19:10251658  | 15.5                     |  |
| Insulin-like growth factor 1                                                                           | IGF1               | hCV2801121  | rs2946834  | 1.9 kb 3'        | A/G | A  | 24     | 22   | 46 | 0.52 | 0.1            |       | chr12:101290281 | 84.6                     |  |
|                                                                                                        |                    | hCV2801103  | rs972936   | intron           | T/C | C  | 28     | 28   | 56 | 0.5  | 0              |       | chr12:101327388 |                          |  |

|                                       |       |             |            |                  |     |   |        |    |    |      |      |       |                          |                           |  |
|---------------------------------------|-------|-------------|------------|------------------|-----|---|--------|----|----|------|------|-------|--------------------------|---------------------------|--|
|                                       |       | hCV346219   | rs10735380 | intron           | A/G | G | 30     | 27 | 57 | 0.53 | 0.2  |       | chr12:101346703          |                           |  |
|                                       |       | MFD1        |            | 0.7 kb 5'        |     |   | 209 bp | 15 | 28 | 43   | 0.35 | 3.9   | 0.047                    | chr12:101377520-101377731 |  |
| insulin-like growth factor 1 receptor | IGF1R | hCV11527385 | rs11247361 | intron           | C/G | C | 30     | 27 | 57 | 0.53 | 0.2  |       | chr15:97024915           | 308.7                     |  |
|                                       |       | hCV1599413  | rs7166348  | intron           | A/G | G | 28     | 25 | 53 | 0.53 | 0.2  |       | chr15:97065318           |                           |  |
|                                       |       | hCV1119260  | rs8041224  | intron           | C/T | C | 29     | 22 | 51 | 0.57 | 1    |       | chr15:97115188           |                           |  |
|                                       |       | hCV15910812 | rs2684761  | intron           | A/G | G | 31     | 28 | 59 | 0.53 | 0.2  |       | chr15:97181893           |                           |  |
|                                       |       | hCV1599489  | rs1879612  | intron           | C/T | C | 32     | 24 | 56 | 0.57 | 1.1  |       | chr15:97216231           |                           |  |
|                                       |       | hCV11713576 | rs11247379 | intron           | A/G | G | 26     | 21 | 47 | 0.55 | 0.5  |       | chr15:97247599           |                           |  |
|                                       |       | AFMA305YE1  |            | intron           |     |   | 168 bp | 28 | 27 | 55   | 0.51 | 0     | chr15:97249147-97249302  |                           |  |
|                                       |       | hCV239822   | rs4966044  | intron           | A/G | G | 32     | 27 | 59 | 0.54 | 0.4  |       | chr15:97283721           |                           |  |
|                                       |       | hCV1834836  | rs2684799  | intron           | C/T | C | 38     | 36 | 74 | 0.51 | 0.1  |       | chr15:97299355           |                           |  |
| interleukin-1A                        | IL1A  | MFD68A      |            | intron           |     |   | 148 bp | 19 | 24 | 43   | 0.44 | 0.6   | chr2:113251917-113252063 | 11.5                      |  |
|                                       |       | hCV9546471  | rs17561    | Ser(T)114Ala(G)  | A/C | C | 31     | 26 | 57 | 0.54 | 0.4  |       | chr2:113253454           |                           |  |
|                                       |       | rs1800587   | rs1800587  | C-889T in 5'UTR  | C/T | C | 21     | 18 | 39 | 0.54 | 0.2  |       | chr2:113259191           |                           |  |
| interleukin-1B                        | IL1B  | hCV9546517  | rs1143634  | Phe(T)105Phe(C)  | C/T | T | 26     | 25 | 51 | 0.51 | 0    |       | chr2:113306621           | 7                         |  |
| interleukin-1 receptor type 1         | IL1R1 | hCV1226688  | rs13020778 | intron           | C/T | C | 37     | 32 | 69 | 0.54 | 0.4  |       | chr2:102243092           | 25.9                      |  |
|                                       |       | rs2234650   | rs2234650  | 12.1 kb 5'       | C/T | T | 25     | 23 | 48 | 0.52 | 0.1  |       | chr2:102216845           |                           |  |
| interleukin-1 receptor antagonist     | IL1RN | hCV3133518  | rs1794065  | intron           | G/A | A | 32     | 19 | 51 | 0.63 | 3.3  |       | chr2:113595964           | 16.1                      |  |
|                                       |       | IL1RN-VNTR  |            | intron           |     |   | 1      | 13 | 25 | 38   | 0.34 | 3.8   | chr2:113604303-113604714 |                           |  |
|                                       |       |             |            |                  |     |   | 2      | 22 | 13 | 35   | 0.63 | 2.3   |                          |                           |  |
|                                       |       |             |            |                  |     |   | 3      | 5  | 2  | 7    | 0.71 | 1.3   |                          |                           |  |
|                                       |       | hCV948691   | rs315951   | 3'UTR            | C/G | C | 23     | 19 | 42 | 0.55 | 0.4  |       | chr2:113606817           |                           |  |
|                                       |       | hCV1939887  | rs895495   | 8.2 kb 3'        | G/A | G | 31     | 22 | 53 | 0.58 | 1.5  |       | chr2:113615989           |                           |  |
| interleukin 10                        | IL10  | hCV8828803  | rs1518111  | intron           | C/T | T | 27     | 26 | 53 | 0.51 | 0    |       | chr1:203333040           | 4.9                       |  |
| integrin, alpha 1                     | ITGA1 | hCV2840453  | rs13188662 | intron           | A/G | A | 30     | 26 | 56 | 0.54 | 0.3  |       | chr5:52127404            | 165.3                     |  |
|                                       |       | hCV2839032  | rs2938793  | intron           | G/T | G | 37     | 27 | 64 | 0.58 | 1.6  |       | chr5:52167348            |                           |  |
|                                       |       | hCV1150586  | rs16880453 | intron           | G/C | G | 35     | 32 | 67 | 0.52 | 0.1  |       | chr5:52231264            |                           |  |
|                                       |       | hCV1150569  | rs2406370  | intron           | A/G | G | 38     | 35 | 73 | 0.52 | 0.1  |       | chr5:52254090            |                           |  |
|                                       |       | hCV1150525  | rs1124141  | 3'UTR            | A/G | A | 37     | 36 | 73 | 0.51 | 0    |       | chr5:52286014            |                           |  |
| integrin, alpha 3                     | ITGA3 | hCV2539685  | rs2301628  | intron           | A/G | G | 38     | 31 | 69 | 0.55 | 0.7  |       | chr17:45503412           | 34.1                      |  |
|                                       |       | ITGA3-STRP  |            | intron           |     |   | 238 bp | 23 | 34 | 57   | 0.4  | 2.1   | chr17:45512727-45512969  |                           |  |
| laminin A4                            | LAMA4 | hCV2462170  | rs1050353  | Val(A)1713Val(T) | A/T | A | 30     | 29 | 59 | 0.51 | 0    |       | chr6:112542605           | 145.7                     |  |
|                                       |       | hCV2462178  | rs969139   | intron           | C/T | T | 44     | 32 | 76 | 0.58 | 1.9  |       | chr6:112553569           |                           |  |
|                                       |       | hCV2462186  | rs3734287  | intron           | C/T | C | 37     | 19 | 56 | 0.66 | 5.8  | 0.016 | chr6:112560938           |                           |  |
|                                       |       | hCV2462219  | rs11153344 | intron           | A/G | G | 35     | 31 | 66 | 0.53 | 0.2  |       | chr6:112581548           |                           |  |
|                                       |       | LAMA4-STRP  |            | intron           |     |   | 119 bp | 27 | 15 | 42   | 0.64 | 3.4   | chr6:112595692-112595823 |                           |  |
|                                       |       | hCV2462251  | rs1050348  | His(C)491Tyr(T)  | A/G | A | 28     | 24 | 52 | 0.54 | 0.3  |       | chr6:112600565           |                           |  |
|                                       |       | hCV2462280  | rs3777928  | intron           | A/C | A | 33     | 30 | 63 | 0.52 | 0.1  |       | chr6:112623278           |                           |  |

|                                                          |        |             |            |                  |     |   |        |    |    |      |      |       |                 |                          |  |
|----------------------------------------------------------|--------|-------------|------------|------------------|-----|---|--------|----|----|------|------|-------|-----------------|--------------------------|--|
|                                                          |        | hCV2462319  | rs2157547  | intron           | C/G | G | 20     | 18 | 38 | 0.53 | 0.1  |       | chr6:112648283  |                          |  |
|                                                          |        | hCV11903282 | rs1894682  | intron           | A/G | A | 33     | 23 | 56 | 0.59 | 1.8  |       | chr6:112674963  |                          |  |
| laminin B1                                               | LAMB1  | hCV2193686  | rs2237685  | intron           | G/A | G | 38     | 30 | 68 | 0.56 | 0.9  |       | chr7:107168735  | 79.5                     |  |
|                                                          |        | D7S3074     |            | intron           |     |   | 138 bp | 27 | 16 | 43   | 0.63 | 2.8   |                 | chr7:107185260-107185394 |  |
|                                                          |        | hCV3268606  | rs2072208  | intron           | A/G | A | 31     | 27 | 58 | 0.53 | 0.3  |       | chr7:107185865  |                          |  |
|                                                          |        | hCV1091265  | rs2237702  | intron           | G/A | G | 33     | 29 | 62 | 0.53 | 0.3  |       | chr7:107216239  |                          |  |
|                                                          |        | hCV2631054  | rs1732145  | 7.3 kb 5'        | C/T | C | 29     | 27 | 56 | 0.52 | 0.1  |       | chr7:107245066  |                          |  |
| laminin-gamma 1                                          | LAMC1  | hCV505167   | rs10737236 | 4 kb 5'          | C/T | T | 45     | 30 | 75 | 0.6  | 3    |       | chr1:179720265  | 122.1                    |  |
|                                                          |        | hCV26124236 | rs10911194 | Ala(C)58Ala(T)   | A/G | G | 46     | 31 | 77 | 0.6  | 2.9  |       | chr1:179724682  |                          |  |
|                                                          |        | hCV9066112  | rs10797819 | intron           | G/A | A | 46     | 28 | 74 | 0.62 | 4.4  | 0.036 |                 | chr1:179738568           |  |
|                                                          |        | hCV1770066  | rs4652775  | intron           | A/T | A | 45     | 29 | 74 | 0.61 | 3.5  |       | chr1:179793482  |                          |  |
|                                                          |        | hCV3127531  | rs2296288  | Cys(C)182Cys(T)  | T/C | T | 46     | 29 | 75 | 0.61 | 3.9  | 0.050 |                 | chr1:179804247           |  |
|                                                          |        | hCV11632431 | rs7556132  | Ile(A)458Val(G)  | A/G | A | 47     | 29 | 76 | 0.62 | 4.3  | 0.039 |                 | chr1:179817412           |  |
|                                                          |        | hCV3127590  | rs2296292  | Ala(C)592Ala(A)  | A/C | A | 45     | 28 | 73 | 0.62 | 4    | 0.047 |                 | chr1:179818414           |  |
|                                                          |        | hCV3127518  | rs20557    | Asn(C)837Asn(T)  | T/C | T | 46     | 27 | 73 | 0.63 | 4.9  | 0.026 |                 | chr1:179825532           |  |
|                                                          |        | hCV3127512  | rs7410919  | Leu888Pro        | T/C | T | 47     | 29 | 76 | 0.62 | 4.3  | 0.039 |                 | chr1:179826204           |  |
|                                                          |        | LAMC1-STRP  |            | intron           |     |   | 215 bp | 31 | 20 | 51   | 0.61 | 2.4   |                 | chr1:179832071-179832282 |  |
|                                                          |        | hCV3127470  | rs4651146  | Arg(C)1376Arg(T) | T/C | C | 42     | 28 | 70 | 0.6  | 2.8  |       | chr1:179837191  |                          |  |
|                                                          |        | hCV3127469  | rs3818419  | Ala(A)1433Ala(G) | G/A | G | 33     | 32 | 65 | 0.51 | 0    |       | chr1:179837362  |                          |  |
|                                                          |        | hCV3127459  | rs1547715  | 3' UTR           | A/G | A | 47     | 30 | 77 | 0.61 | 3.8  |       | chr1:179845609  |                          |  |
| laminin gamma 2                                          | LAMC2  | hCV3127421  | rs566625   | intron           | A/G | A | 45     | 29 | 74 | 0.61 | 3.5  |       | chr1:179893098  | 58.6                     |  |
| lectin, galactoside-binding, soluble, 3                  | LGALS3 | hCV7593627  | rs1009978  | intron           | C/G | C | 37     | 27 | 64 | 0.58 | 1.6  |       | chr14:54672814  | 16.1                     |  |
| lipoprotein lipase                                       | LPL    | hCV9642885  | rs10104051 | intron           | C/T | C | 28     | 26 | 54 | 0.52 | 0.1  |       | chr8:19846682   | 28                       |  |
|                                                          |        | rs285       | rs285      | intron           | C/T | T | 35     | 33 | 68 | 0.51 | 0.1  |       | chr8:19859469   |                          |  |
|                                                          |        | rs320       | rs320      | intron           | G/T | T | 41     | 19 | 60 | 0.68 | 8.1  | 0.005 |                 | chr8:19863357            |  |
|                                                          |        | hCV1843005  | rs326      | intron           | A/G | A | 41     | 21 | 62 | 0.66 | 6.5  | 0.011 |                 | chr8:19863719            |  |
|                                                          |        | hCV9639448  | rs13702    | 3' UTR           | C/T | T | 40     | 18 | 58 | 0.69 | 8.3  | 0.004 |                 | chr8:19868772            |  |
| latent transforming growth factor beta binding protein 1 | LTBP1  | hCV9731966  | rs10432657 | intron           | A/G | G | 41     | 33 | 74 | 0.55 | 0.9  |       | chr2:33286784   | 264.9                    |  |
|                                                          |        | hCV8839400  | rs1065324  | Ala(A)126Ala(G)  | A/G | G | 41     | 33 | 74 | 0.55 | 0.9  |       | chr2:33323728   |                          |  |
|                                                          |        | hCV8375751  | rs17641180 | intron           | A/G | A | 38     | 32 | 70 | 0.54 | 0.5  |       | chr2:33333288   |                          |  |
|                                                          |        | hCV8839619  | rs817535   | intron           | C/T | T | 39     | 38 | 77 | 0.51 | 0    |       | chr2:33382307   |                          |  |
|                                                          |        | hCV8840470  | rs935996   | intron           | A/C | A | 35     | 32 | 67 | 0.52 | 0.1  |       | chr2:33437033   |                          |  |
|                                                          |        | hCV1606121  | rs2034693  | intron           | C/T | C | 32     | 30 | 62 | 0.52 | 0.1  |       | chr2:33534957   |                          |  |
| mitogen-inducible gene 6 protein                         | MIG6   | hCV2966793  | rs370812   | intron           | C/T | C | 41     | 31 | 72 | 0.57 | 1.4  |       | chr1:8010160    | 14.6                     |  |
| matrix metalloproteinase 1                               | MMP1   | hCV632723   | rs5854     | 3'UTR            | G/A | G | 40     | 25 | 65 | 0.62 | 3.5  |       | chr11:102166084 | 8.2                      |  |
|                                                          |        | hCV7492469  | rs484915   | 4.3 kb 5'        | A/T | T | 32     | 28 | 60 | 0.53 | 0.3  |       | chr11:102178458 |                          |  |
| matrix metalloproteinase 2                               | MMP2   | hCV15872551 | rs2241145  | intron           | G/C | C | 32     | 31 | 63 | 0.51 | 0    |       | chr16:54079701  | 27                       |  |
|                                                          |        | hCV3225975  | rs243832   | intron           | C/G | C | 35     | 33 | 68 | 0.51 | 0.1  |       | chr16:54096692  |                          |  |

|                                                                                                                       |               |             |            |                 |     |     |        |    |    |      |      |       |                         |                         |  |
|-----------------------------------------------------------------------------------------------------------------------|---------------|-------------|------------|-----------------|-----|-----|--------|----|----|------|------|-------|-------------------------|-------------------------|--|
| matrix metalloproteinase 3                                                                                            | MMP3          | hCV785964   | rs520540   | Ala(C)362Ala(T) | C/T | C   | 39     | 34 | 73 | 0.53 | 0.3  |       | chr16:54079701          | 7.8                     |  |
|                                                                                                                       |               | hCV3047717  | rs679620   | Glu(G)45Lys(A)  | G/A | G   | 39     | 33 | 72 | 0.54 | 0.5  |       | chr11:102218830         |                         |  |
| Matrix metalloproteinase 9                                                                                            | MMP9          | hCV1414746  | rs11697325 | 8.2 kb 5'       | A/G | A   | 31     | 16 | 47 | 0.66 | 4.8  | 0.029 | chr20:44062752          | 7.6                     |  |
|                                                                                                                       |               | D20S838     |            | 5'UTR           |     | A14 | 30     | 26 | 56 | 0.54 | 0.3  |       | chr20:44070802-44070923 |                         |  |
|                                                                                                                       |               |             |            |                 |     | A21 | 24     | 22 | 46 | 0.52 | 0.1  |       |                         |                         |  |
|                                                                                                                       |               | hCV11655953 | rs2664538  | Gln(A)279Arg(G) | A/G | A   | 30     | 20 | 50 | 0.6  | 2    |       | chr20:44073632          |                         |  |
| 5,10-methylenetetrahydrofolate reductase (NADPH) nuclear factor of kappa light polypeptide gene enhancer in B-cells 1 | MTHFR         | rs1801133   | rs1801133  | Ala(T)222Val(C) | C/T | C   | 29     | 21 | 50 | 0.58 | 1.3  |       | chr1:11790644           | 19.3                    |  |
|                                                                                                                       | NFKB1         | hCV3066487  | rs3774932  | intron          | A/G | A   | 33     | 26 | 59 | 0.56 | 0.8  |       | chr4:103781378          | 116                     |  |
|                                                                                                                       |               | hCV804243   | rs230526   | intron          | A/G | G   | 29     | 21 | 50 | 0.58 | 1.3  |       | chr4:103816010          |                         |  |
|                                                                                                                       |               | hCV804225   | rs230498   | intron          | A/G | G   | 30     | 19 | 49 | 0.61 | 2.5  |       | chr4:103846794          |                         |  |
|                                                                                                                       |               | hCV3066444  | rs1020760  | intron          | C/G | C   | 32     | 24 | 56 | 0.57 | 1.1  |       | chr4:103871638          |                         |  |
| nidogen (enactin)                                                                                                     | NID           | hCV16179265 | rs2273586  | intron          | C/G | G   | 32     | 25 | 57 | 0.56 | 0.9  |       | chr1:232519186          | 88.4                    |  |
| nitric acid synthetase 3 (endothelial)                                                                                | NOS3          | rs1549758sq | rs1549758  | Asp(C)258Asp(T) | A/G | A   | 23     | 20 | 43 | 0.53 | 0.2  |       | chr7:150133374          | 23.5                    |  |
|                                                                                                                       |               | rs1007311sq | rs1007311  | intron          | T/C | T   | 28     | 26 | 54 | 0.52 | 0.1  |       | chr7:150133656          |                         |  |
|                                                                                                                       |               | rs1799983   | rs1799983  | Asp(T)298Glu(G) | A/C | A   | 23     | 21 | 44 | 0.52 | 0.1  |       | chr7:150133759          |                         |  |
|                                                                                                                       |               | hCV7599646  | rs891512   | intron          | A/G | A   | 24     | 21 | 45 | 0.53 | 0.2  |       | chr7:150145737          |                         |  |
| NADPH oxidase 4                                                                                                       | NOX4          | hCV8371888  | rs317147   | intron          | C/T | C   | 35     | 33 | 68 | 0.51 | 0.1  |       | chr11:88807317          | 165.1                   |  |
|                                                                                                                       |               | hCV3223917  | rs12364595 | intron          | C/T | C   | 36     | 33 | 69 | 0.52 | 0.1  |       | chr11:88843094          |                         |  |
|                                                                                                                       |               | hCV3223928  | rs7925520  | intron          | C/G | G   | 34     | 26 | 60 | 0.57 | 1.1  |       | chr11:88853891-         |                         |  |
| natriuretic peptide precursor A                                                                                       | NPPA          | rs5065      | rs5065     | Arg(C)152X(T)   | A/G | A   | 33     | 30 | 63 | 0.52 | 0.1  |       | chr1:11840334           | 2.1                     |  |
| nephrin                                                                                                               | NPHS1         | D19S610     |            | 4.7 kb 5'       |     |     | 155 bp | 26 | 17 | 43   | 0.6  | 1.9   | chr19:41038331-41038491 | 25.9                    |  |
| neuropilin 1                                                                                                          | NRP1          | hCV347431   | rs2247015  | intron          | T/G | T   | 36     | 35 | 71 | 0.51 | 0.0  |       | chr10:33525484          | 157                     |  |
|                                                                                                                       |               | hCV346947   | rs2474714  | intron          | G/A | A   | 37     | 35 | 72 | 0.51 | 0.1  |       | chr10:33535989          |                         |  |
|                                                                                                                       |               | hCV2738770  | rs927099   | intron          | C/T | T   | 39     | 30 | 69 | 0.57 | 1.2  |       | chr10:33565842          |                         |  |
|                                                                                                                       |               | hCV7467750  | rs1319013  | intron          | T/G | T   | 35     | 33 | 68 | 0.51 | 0.1  |       | chr10:33583935          |                         |  |
|                                                                                                                       |               | hCV7467760  | rs869636   | intron          | T/C | C   | 36     | 21 | 57 | 0.63 | 3.9  | 0.047 |                         | chr10:33612045          |  |
|                                                                                                                       |               | hCV2738721  | rs1331326  | intron          | T/C | C   | 41     | 30 | 71 | 0.58 | 1.7  |       | chr10:33619896          |                         |  |
|                                                                                                                       |               | hCV11659809 | rs2804495  | intron          | T/G | G   | 42     | 24 | 66 | 0.64 | 4.9  | 0.027 |                         | chr10:33652506          |  |
| osteopontin/secreted phosphoprotein 1 p22-phox/cytochrome b-245, alpha polypeptide                                    | OPN/SPP1      | hCV1840818  | rs1126616  | Ala(T)236Ala(C) | T/C | T   | 26     | 25 | 51 | 0.51 | 0    |       | chr4:89261032           | 7.8                     |  |
|                                                                                                                       | p22-phox/CYBA | rs1049255   | rs1049255  | Ala(C)174Val(T) | C/T | T   | 35     | 32 | 67 | 0.52 | 0.1  |       | chr16:87237213          | 7.8                     |  |
|                                                                                                                       |               | hCV11291909 | rs3794622  | intron          | C/T | C   | 35     | 34 | 69 | 0.51 | 0.0  |       | chr16:87238383          |                         |  |
|                                                                                                                       |               | hCV2038     | rs4673     | His(C)72Tyr(T)  | T/C | C   | 32     | 17 | 49 | 0.65 | 4.6  | 0.032 | chr16:87240737          |                         |  |
| platelet-derived growth factor-b                                                                                      | PDGFB         | hCV15962706 | rs2285094  | intron          | G/T | G   | 36     | 33 | 69 | 0.52 | 0.1  |       | chr22:37947060          | 21.3                    |  |
|                                                                                                                       |               | hCV15872223 | rs2267406  | intron          | C/T | T   | 27     | 22 | 49 | 0.55 | 0.5  |       | chr22:37958249          |                         |  |
|                                                                                                                       |               | PDGFB-STRP  |            | 5' UTR          |     |     | 105 bp | 18 | 26 | 44   | 0.41 | 1.5   |                         | chr22:37970237-37970356 |  |
| platelet-derived growth factor                                                                                        | PDGFRB        | hCV11263234 | rs6865659  | 7.6 kb 3'       | A/G | G   | 35     | 34 | 69 | 0.51 | 0    |       | chr5:149465965          | 41.9                    |  |

|                                                    |            |             |            |                  |        |    |    |     |      |                |                         |                |                |
|----------------------------------------------------|------------|-------------|------------|------------------|--------|----|----|-----|------|----------------|-------------------------|----------------|----------------|
| receptor-beta                                      |            | hCV3220603  | rs2240780  | intron           | A/G    | G  | 41 | 33  | 74   | 0.55           | 0.9                     | chr5:149493265 |                |
|                                                    |            | hCV344379   | rs3756312  | 1.9 kb 5'        | A/G    | A  | 40 | 27  | 67   | 0.6            | 2.5                     | chr5:149517387 |                |
| peroxisome proliferative activated receptor, gamma | PPARG      | hCV9384508  | rs2972164  | intron           | T/C    | C  | 33 | 31  | 64   | 0.52           | 0.1                     | chr3:12309416  | 146.5          |
|                                                    |            | hCV9384377  | rs12493718 | intron           | G/T    | T  | 31 | 23  | 54   | 0.57           | 1.2                     | chr3:12338637  |                |
|                                                    |            | hCV1129864  | rs1801282  | Ala(G)12Pro(C)   | G/C    | C  | 22 | 18  | 40   | 0.55           | 0.4                     | chr3:12368125  |                |
|                                                    |            | hCV1129842  | rs2028759  | intron           | C/T    | C  | 40 | 34  | 74   | 0.54           | 0.5                     | chr3:12393612  |                |
|                                                    |            | hCV1129824  | rs2959273  | intron           | A/G    | G  | 34 | 28  | 62   | 0.55           | 0.6                     | chr3:12417731  |                |
|                                                    |            | hCV3158666  | rs1175542  | intron           | G/A    | A  | 39 | 34  | 73   | 0.53           | 0.3                     | chr3:12441214  |                |
| protein kinase C, alpha                            | PRKCA      | hCV2866405  | N/A        | intron           | G/A    | A  | 39 | 28  | 67   | 0.58           | 1.8                     | chr17:61732304 | 507.9          |
|                                                    |            | hCV11876714 | rs11654719 | intron           | C/T    | C  | 35 | 30  | 65   | 0.54           | 0.4                     | chr17:61770842 |                |
|                                                    |            | hCV2866336  | rs11658459 | intron           | G/A    | A  | 28 | 26  | 54   | 0.52           | 0.1                     | chr17:61806742 |                |
|                                                    |            | hCV2654166  | rs3843733  | intron           | C/T    | C  | 35 | 34  | 69   | 0.51           | 0                       | chr17:61893622 |                |
|                                                    |            | hCV223105   | rs2361485  | intron           | C/T    | C  | 36 | 27  | 63   | 0.57           | 1.3                     | chr17:61940988 |                |
|                                                    |            | hCV2666751  | rs1003598  | intron           | A/C    | A  | 35 | 32  | 67   | 0.52           | 0.1                     | chr17:61981869 |                |
|                                                    |            | hCV2956764  | rs8075979  | intron           | C/T    | T  | 37 | 34  | 71   | 0.52           | 0.1                     | chr17:62006600 |                |
|                                                    |            | hCV341669   | rs9896134  | intron           | C/T    | T  | 31 | 20  | 51   | 0.61           | 2.4                     | chr17:62029903 |                |
|                                                    |            | hCV16181069 | rs2286958  | intron           | G/C    | G  | 30 | 26  | 56   | 0.54           | 0.3                     | chr17:62115852 |                |
|                                                    |            | hCV316473   | rs7215747  | intron           | A/G    | G  | 31 | 28  | 59   | 0.53           | 0.2                     | chr17:62155186 |                |
| hCV150109                                          | rs17710992 | intron      | A/G        | A                | 31     | 31 | 62 | 0.5 | 0    | chr17:62204090 |                         |                |                |
| protein kinase C, beta 1                           | PRKCB1     | hCV27475914 | rs3760106  | C-1504T in 5'UTR | C/T    | C  | 27 | 19  | 46   | 0.59           | 1.4                     | chr16:23753297 | 384.2          |
|                                                    |            | hCV9611559  | rs2575390  | G-546C in 5'UTR  | G/C    | C  | 29 | 20  | 49   | 0.59           | 1.7                     | chr16:23754255 |                |
|                                                    |            | hCV2192055  | rs3826262  | intron           | C/T    | C  | 32 | 23  | 55   | 0.58           | 1.5                     | chr16:23774898 |                |
|                                                    |            | hCV11192702 | rs9924860  | intron           | A/C    | A  | 38 | 29  | 67   | 0.57           | 1.2                     | chr16:23804560 |                |
|                                                    |            | hCV11192725 | rs3785392  | intron           | A/G    | A  | 32 | 32  | 64   | 0.5            | 0                       | chr16:23851984 |                |
|                                                    |            | hCV9609158  | rs916677   | intron           | T/C    | T  | 40 | 29  | 69   | 0.58           | 1.8                     | chr16:23910339 |                |
|                                                    |            | hCV1936104  | rs11865731 | intron           | A/C    | C  | 27 | 21  | 48   | 0.56           | 0.8                     | chr16:23937663 |                |
|                                                    |            | hCV1936029  | rs11644387 | intron           | A/G    | A  | 29 | 17  | 46   | 0.63           | 3.1                     | chr16:23977337 |                |
|                                                    |            | hCV583834   | rs405322   | intron           | T/G    | T  | 33 | 26  | 59   | 0.56           | 0.8                     | chr16:24022987 |                |
|                                                    |            | hCV583818   | rs198200   | intron           | C/G    | C  | 30 | 28  | 58   | 0.52           | 0.1                     | chr16:24055410 |                |
|                                                    |            | hCV8918943  | rs1015408  | intron           | A/T    | T  | 30 | 15  | 45   | 0.67           | 5                       | 0.254          | chr16:24117863 |
| D16S420                                            |            | 8.9 kb 3'   |            |                  | 190 bp | 27 | 30 | 57  | 0.47 | 0.2            | chr16:24143725-24143913 |                |                |
| renin                                              | REN        | hCV8687919  | rs1464816  | intron           | G/T    | T  | 29 | 26  | 55   | 0.53           | 0.2                     | chr1:200860511 | 11.5           |
| SA hypertension-associated homolog (rat)           | SAH        | hCV2192241  | rs886433   | intron           | G/T    | G  | 24 | 24  | 48   | 0.5            | 0                       | chr16:20695685 | 33.2           |
| selectin E                                         | SELE       | hCV2459451  | rs2076059  | intron           | C/T    | T  | 31 | 29  | 60   | 0.52           | 0.1                     | chr1:166430579 | 11.4           |
| selectin L                                         | SELL       | hCV11975318 | rs1883228  | intron           | G/A    | A  | 27 | 26  | 53   | 0.51           | 0                       | chr1:166408658 | 20.9           |
| serum/glucocorticoid regulated kinase              | SGK        | hCV1347310  | rs1075427  | 8.2 kb 5'        | C/T    | C  | 36 | 29  | 65   | 0.55           | 0.8                     | chr6:134545897 | 5.6            |
| solute carrier family 9 (Na+/H+ antiporter)        | SLC9A1     | hCV12009155 | rs5810     | 3'UTR            | A/G    | G  | 34 | 32  | 66   | 0.52           | 0.1                     | chr1:27110361  | 56.1           |

|                                                                   |         |             |            |                  |     |        |    |    |    |       |      |       |                        |       |
|-------------------------------------------------------------------|---------|-------------|------------|------------------|-----|--------|----|----|----|-------|------|-------|------------------------|-------|
|                                                                   |         | SLC9A1-STRP |            | intron           |     | 140 bp | 25 | 35 | 60 | 0.42  | 1.7  |       | chr1:27050170-27050308 |       |
|                                                                   |         | hCV1900526  | rs752454   | intron           | C/T | C      | 35 | 31 | 66 | 0.53  | 0.2  |       | chr1:27139647          |       |
| solute carrier family 12 (sodium/chloride transporters), member 3 | SLC12A3 | hCV7729434  | rs12918664 | intron           | C/T | C      | 27 | 26 | 53 | 0.51  | 0    |       | chr16:55458020         | 48.2  |
|                                                                   |         | hCV11196576 | rs9925265  | 2.9 kb 3'        | A/G | A      | 39 | 29 | 68 | 0.57  | 1.5  |       | chr16:55507711         |       |
| SMAD, mothers against DPP homolog 3 (Drosophila)                  | SMAD3   | hCV9707890  | rs1498506  | intron           | A/C | A      | 28 | 18 | 46 | 0.61  | 2.2  |       | chr15:65154688         | 129.3 |
|                                                                   |         | hCV2113018  | rs4776890  | intron           | C/G | T      | 40 | 24 | 64 | 0.625 | 4.00 | 0.046 | chr15:65180099         |       |
|                                                                   |         | hCV11306173 | rs12594610 | intron           | G/A | G      | 36 | 20 | 56 | 0.64  | 4.6  | 0.033 | chr15:65182972         |       |
|                                                                   |         | hCV2112975  | rs11631380 | intron           | C/T | T      | 32 | 19 | 51 | 0.627 | 3.31 |       | chr15:65214243         |       |
|                                                                   |         | hCV2112965  | rs745103   | intron           | A/G | A      | 29 | 29 | 58 | 0.5   | 0    |       | chr15:65222129         |       |
|                                                                   |         | hCV1044749  | rs731874   | intron           | A/G | G      | 31 | 23 | 54 | 0.57  | 1.2  |       | chr15:65233885         |       |
|                                                                   |         | hCV2112907  | rs2289791  | intron           | G/T | T      | 29 | 19 | 48 | 0.6   | 2.1  |       | chr15:65264006         |       |
| transcobalamin II                                                 | TCN2    | hCV325467   | rs1801198  | Pro(C)259Arg(G)  | C/G | G      | 30 | 23 | 53 | 0.57  | 0.9  |       | chr22:29336164         | 19.9  |
| transforming growth factor B1                                     | TGFB1   | hCV22272997 | rs1982073  | Pro(C)10Leu(T)   | A/G | A      | 23 | 21 | 44 | 0.52  | 0.1  |       | chr19:46550761         | 23.1  |
|                                                                   |         | 3236        | rs1800469  | C-509T in 5' UTR | A/G | G      | 24 | 24 | 48 | 0.5   | 0    |       | chr19:46552136         |       |
| transforming growth factor B2                                     | TGFB2   | hCV12081791 | rs2009112  | intron           | C/T | C      | 34 | 30 | 64 | 0.53  | 0.3  |       | chr1:214941924         | 95.1  |
|                                                                   |         | hCV12081803 | rs1891467  | intron           | A/G | G      | 22 | 21 | 43 | 0.51  | 0    |       | chr1:214968380         |       |
| transforming growth factor B3                                     | TGFB3   | hCV15874941 | rs2268626  | intron           | C/T | C      | 27 | 23 | 50 | 0.54  | 0.3  |       | chr14:75514520         | 23    |
|                                                                   |         | hCV2774236  | rs3917187  | intron           | T/C | C      | 25 | 22 | 47 | 0.53  | 0.2  |       | chr14:75501889         |       |
| transforming growth factor-B receptor 2                           | TGFBR2  | hCV3158972  | rs13081419 | intron           | A/C | C      | 41 | 31 | 72 | 0.57  | 1.4  |       | chr3:30631478          | 85.1  |
|                                                                   |         | hCV11565979 | rs1431131  | intron           | A/T | T      | 34 | 30 | 64 | 0.53  | 0.3  |       | chr3:30650884          |       |
|                                                                   |         | hCV1612549  | rs1155705  | intron           | A/G | G      | 34 | 32 | 66 | 0.52  | 0.1  |       | chr3:30661418          |       |
|                                                                   |         | hCV972343   | rs1078985  | intron           | A/G | G      | 24 | 22 | 46 | 0.52  | 0.1  |       | chr3:30665915          |       |
|                                                                   |         | hCV8778179  | rs995435   | intron           | A/G | G      | 27 | 21 | 48 | 0.56  | 0.8  |       | chr3:30675926          |       |
|                                                                   |         | hCV1612506  | rs6792117  | intron           | A/G | G      | 41 | 23 | 64 | 0.64  | 5.1  | 0.024 | chr3:30679011          |       |
|                                                                   |         | hCV1612480  | rs744751   | 2.8 kb 3'        | A/G | A      | 29 | 25 | 54 | 0.54  | 0.3  |       | chr3:30710941          |       |
| transforming growth factor-B receptor 3                           | TGFBR3  | hCV1931721  | rs1805113  | Phe(C)673Phe(T)  | A/G | G      | 38 | 30 | 68 | 0.56  | 0.9  |       | chr1:91889959          | 203.7 |
|                                                                   |         | hCV3130156  | rs284180   | intron           | A/C | A      | 38 | 32 | 70 | 0.54  | 0.5  |       | chr1:91939869          |       |
|                                                                   |         | hCV3130147  | rs284190   | intron           | A/T | T      | 37 | 29 | 66 | 0.56  | 1    |       | chr1:91947935          |       |
|                                                                   |         | hCV3130125  | rs12756024 | intron           | A/C | C      | 42 | 23 | 65 | 0.65  | 5.6  | 0.018 | chr1:91960461          |       |
|                                                                   |         | hCV11643684 | rs5019497  | intron           | A/C | A      | 38 | 34 | 72 | 0.53  | 0.2  |       | chr1:91977654          |       |
|                                                                   |         | hCV11643667 | rs10783040 | intron           | A/G | G      | 38 | 28 | 66 | 0.58  | 1.5  |       | chr1:91996030          |       |
|                                                                   |         | hCV1931638  | rs11165595 | intron           | A/G | A      | 34 | 30 | 64 | 0.53  | 0.3  |       | chr1:92014562          |       |
|                                                                   |         | hCV3130092  | rs1192524  | intron           | A/G | A      | 32 | 32 | 64 | 0.5   | 0    |       | chr1:92052705          |       |
|                                                                   |         | hCV3181378  | rs7550034  | intron           | A/G | A      | 37 | 35 | 72 | 0.51  | 0.1  |       | chr1:92076597          |       |
|                                                                   |         | DIS1588     |            | intron           |     | 132 bp | 17 | 28 | 45 | 0.38  | 2.7  |       | chr1:91686052-91686183 |       |
| tissue inhibitor of metalloproteinase 2                           | TIMP2   | hCV146576   | rs11077399 | intron           | G/A | A      | 34 | 28 | 62 | 0.55  | 0.6  |       | chr17:74375770         | 72.4  |
|                                                                   |         | hCV71491    | rs6501261  | intron           | G/T | G      | 35 | 31 | 66 | 0.53  | 0.2  |       | chr17:74412056         |       |

|                                                           |               |             |            |                |     |   |        |    |    |        |      |       |                        |      |                         |
|-----------------------------------------------------------|---------------|-------------|------------|----------------|-----|---|--------|----|----|--------|------|-------|------------------------|------|-------------------------|
| tissue inhibitor of metalloproteinase 2                   | TIMP3         | hCV8712827  | rs135025   | intron         | A/G | A | 38     | 26 | 64 | 0.59   | 2.3  | 0.048 | chr22:31527032         | 62.2 |                         |
|                                                           |               | D22S280     |            | intron         |     |   | 214 bp | 32 | 18 | 50     | 0.64 |       | 3.9                    |      | chr22:31533927-31534146 |
|                                                           |               | hCV3294872  | rs242075   | intron         | A/G | G | 39     | 37 | 76 | 0.51   | 0.1  |       | chr22:31555458         |      |                         |
|                                                           |               | hCV8712964  | rs1065314  | 3'UTR          | T/C | C | 26     | 25 | 51 | 0.51   | 0    |       | chr22:31582842         |      |                         |
| tumor necrosis factor (ligand) superfamily, member 6      | TNFSF6/FASLG  | hCV3175435  | rs929087   | intron         | G/A | G | 39     | 35 | 74 | 0.527  | 0.2  |       | chr1:169363714         | 7.8  |                         |
| tumor necrosis factor receptor 1                          | TNFRSF1A      | hCV2645708  | rs4149577  | intron         | A/G | G | 37     | 29 | 66 | 0.5606 | 1.0  |       | chr12:6317783          | 13.3 |                         |
| transforming growth factor beta-stimulated protein TSC-22 | TSC22/TGFB114 | hCV1925760  | rs2875552  | 3.2 kb 3'      | C/T | C | 33     | 33 | 66 | 0.5    | 0    |       | chr13:43902494         | 3.3  |                         |
| ubiquitin A-52 residue ribosomal protein fusion product 1 | UBA52         | hCV2580747  | rs2302055  | intron         | C/T | T | 36     | 35 | 71 | 0.51   | 0    |       | chr19:18545563         | 3.4  |                         |
| unc-13 homolog B (C. elegans)                             | UNC13B        | hCV2754761  | rs10814211 | intron         | C/T | C | 29     | 28 | 57 | 0.51   | 0    |       | chr9:35169278          | 243  |                         |
|                                                           |               | hCV1755997  | rs2381302  | intron         | A/C | A | 28     | 26 | 54 | 0.52   | 0.1  |       | chr9:35225820          |      |                         |
|                                                           |               | hCV1756005  | rs1930361  | intron         | A/T | A | 33     | 27 | 60 | 0.55   | 0.6  |       | chr9:35256881          |      |                         |
|                                                           |               | hCV2704288  | rs580376   | intron         | C/T | C | 25     | 23 | 48 | 0.52   | 0.1  |       | chr9:35303141          |      |                         |
|                                                           |               | hCV2704302  | rs10814231 | intron         | A/G | A | 21     | 19 | 40 | 0.53   | 0.1  |       | chr9:35351044          |      |                         |
|                                                           |               | hCV15877163 | rs2281999  | intron         | C/T | C | 26     | 23 | 49 | 0.53   | 0.2  |       | chr9:35371504          |      |                         |
| upstream transcription factor 1                           | USF1          | hCV1459759  | rs3737787  | 3'UTR          | A/G | G | 25     | 24 | 49 | 0.51   | 0    |       | chr1:157822596         | 6.7  |                         |
|                                                           |               | rs2073658   | rs2073658  | intron         | C/T | C | 22     | 19 | 41 | 0.54   | 0.2  |       | chr1:157823835         |      |                         |
|                                                           |               | hCV15949520 | rs2073656  | intron         | C/G | G | 22     | 21 | 43 | 0.51   | 0    |       | chr1:157824428         |      |                         |
|                                                           |               | hCV1839183  | rs2516839  | 5'UTR          | C/T | T | 45     | 28 | 73 | 0.62   | 4    | 0.047 | chr1:157826194         |      |                         |
| upstream transcription factor 2                           | USF2          | hCV2604928  | rs2284147  | intron         | A/G | A | 34     | 33 | 67 | 0.51   | 0    |       | chr19:40456881         | 10.8 |                         |
| urotensin 2                                               | UTS2          | hCV2510327  | rs228651   | intron         | C/T | T | 37     | 29 | 66 | 0.56   | 1    |       | chr1:7845365           | 5.8  |                         |
|                                                           |               | hCV1187241  | rs228648   | Met(T)21Thr(C) | A/G | A | 34     | 29 | 63 | 0.54   | 0.4  |       | chr1:7847696           |      |                         |
| vascular endothelial growth factor                        | VEGF          | VEGF-STRP   |            | 3.8 kb 5'      |     |   | 191 bp | 23 | 22 | 45     | 0.51 | 0     | chr6:43781203-43781390 | 14.4 |                         |
|                                                           |               | hCV1647373  | rs833070   | intron         | T/C | T | 38     | 32 | 70 | 0.54   | 0.5  |       | chr6:43850604          |      |                         |
| kinase insert domain receptor                             | VEGFR2/KDR    | hCV1673874  | rs2219471  | intron         | C/T | C | 29     | 21 | 50 | 0.58   | 1.3  |       | chr4:55802087          | 47.1 |                         |
|                                                           |               | hCV3065122  | rs7654599  | intron         | C/T | C | 31     | 23 | 54 | 0.57   | 1.2  |       | chr4:55817096          |      |                         |
|                                                           |               | hCV1673851  | rs1531290  | intron         | A/G | G | 46     | 37 | 83 | 0.55   | 1    |       | chr4:55827490          |      |                         |
